# Supplementary material for: Prediction of two-dimensional narrow-gap Janus TiOXY (X, Y = Cl, Br, I; X ≠ Y) monolayers for electronic and optoelectronic applications
Source: Royal Society of Chemistry journal article supplement (doi:10.1039/d4cp04591b), 2025-01-01
Supplement: d4cp04591b1.pdf [file d4cp04591b1.pdf]

## Supplementary Information

### Prediction of two-dimensional narrow-gap Janus TiOXY (X, Y=Cl, Br, I; X≠Y) monolayers for electronic and optoelectronic applications

Yange Peng<sup>a</sup>, Xiuwen Wu<sup>a</sup>, Shengzhao Yang<sup>a</sup>, Jiansheng Dong<sup>a</sup>, Xi Fu<sup>a,d</sup>, Hairui Bao<sup>a\*</sup>,  
and Wenhui Liao<sup>a,b,c\*</sup>

<sup>a</sup>College of Physics and Electromechanical Engineering, Jishou University, Jishou 416000, China

<sup>b</sup>School of Communication and Electronic Engineering, Jishou University, Jishou 416000, China

<sup>c</sup>Key Laboratory of Mineral Cleaner Production and Exploit of Green Functional Materials in Hunan Province, Jishou University, Jishou 416000, China

<sup>d</sup>College of Science, Hunan University of Science and Engineering, Yongzhou 425199, China

\*E-mail: hrbao@jsu.edu.cn; whliao@jsu.edu.cn

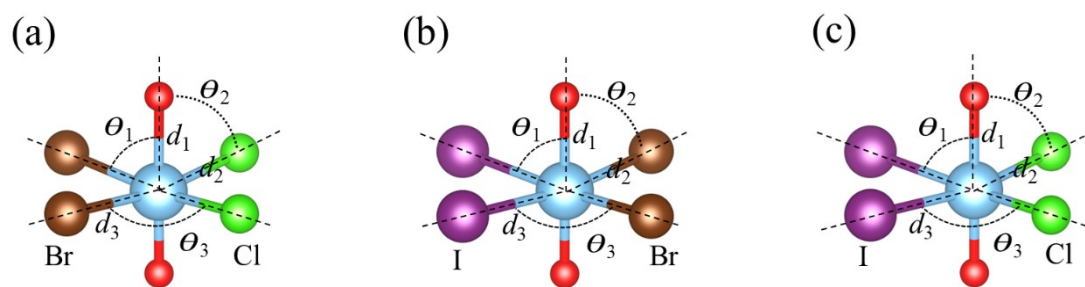

Fig. S1 The labeled bond lengths  $d_1$ ,  $d_2$ , and  $d_3$  (in units of Å) and bond angles  $\theta_1$ ,  $\theta_2$ , and  $\theta_3$  (in units of degree) of the Janus TiOClBr (a), TiOBrI (b), and TiOClI (c) monolayers.

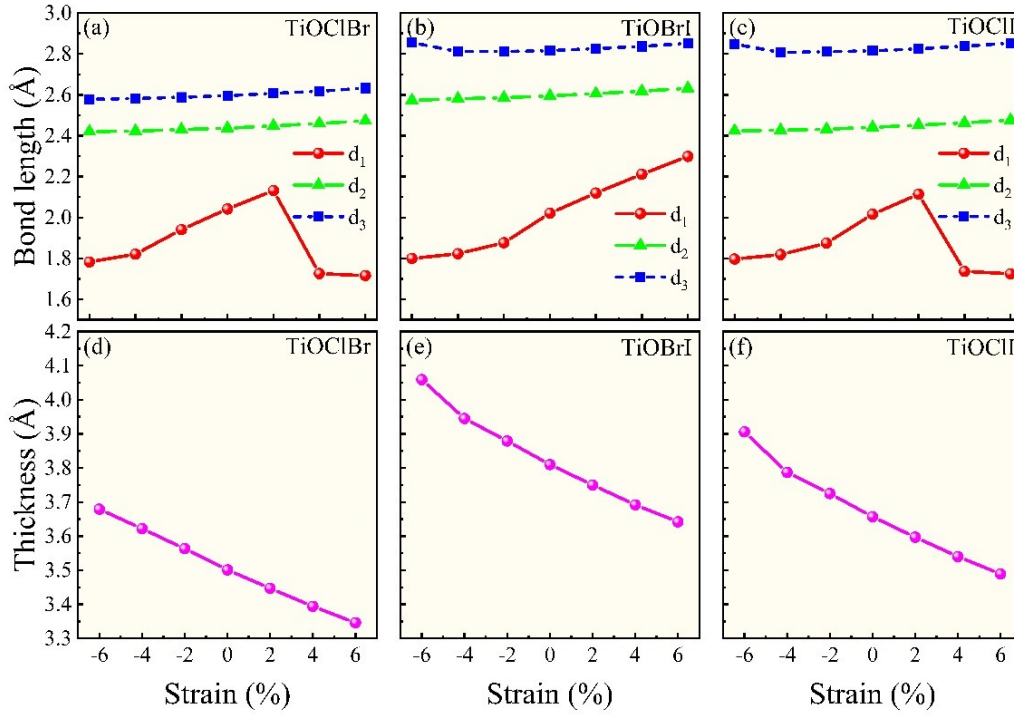

Fig. S2 The variation of (a)-(c) bond lengths  $d_1$ ,  $d_2$ , and  $d_3$  (as denoted by the red-sphere marked solid, green-triangle marked dashed, and blue-sphere marked dashed-dot lines) and (d)-(f) thickness  $h$  (as shown by magenta-sphere marked solid lines) under the in-plane biaxial strain in range from -6% to 6% of the Janus TiOClBr, TiOBrI, and TiOClI monolayers, respectively.

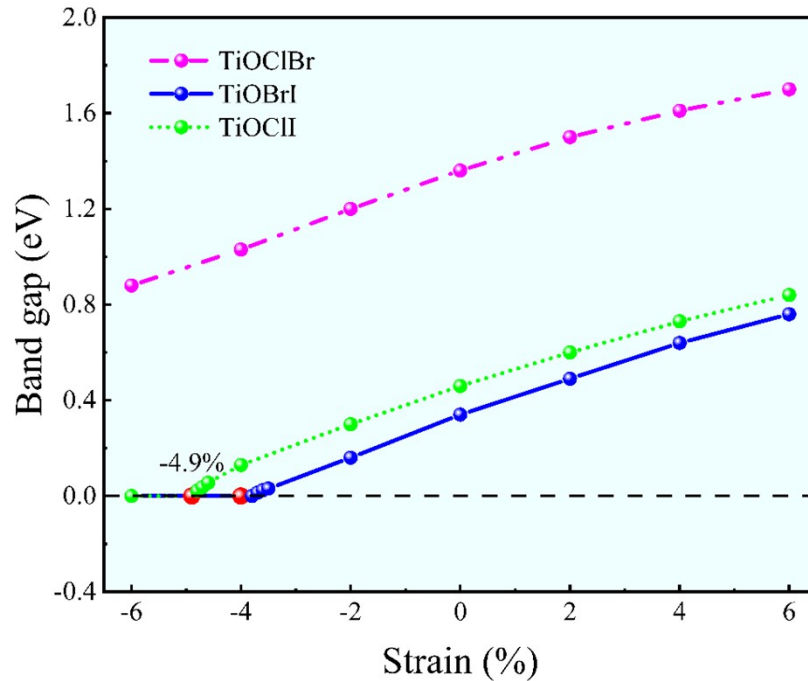

Fig. S3 The variation of band gaps under the in-plane biaxial strain in range from -6% to 6% of the Janus TiOClBr, TiOBrI, and TiOClI monolayers, as denoted by the magenta-sphere marked double-dashed, blue-sphere marked solid and green-sphere marked dot lines, respectively. Where the red-sphere indicates the critical point of strain.

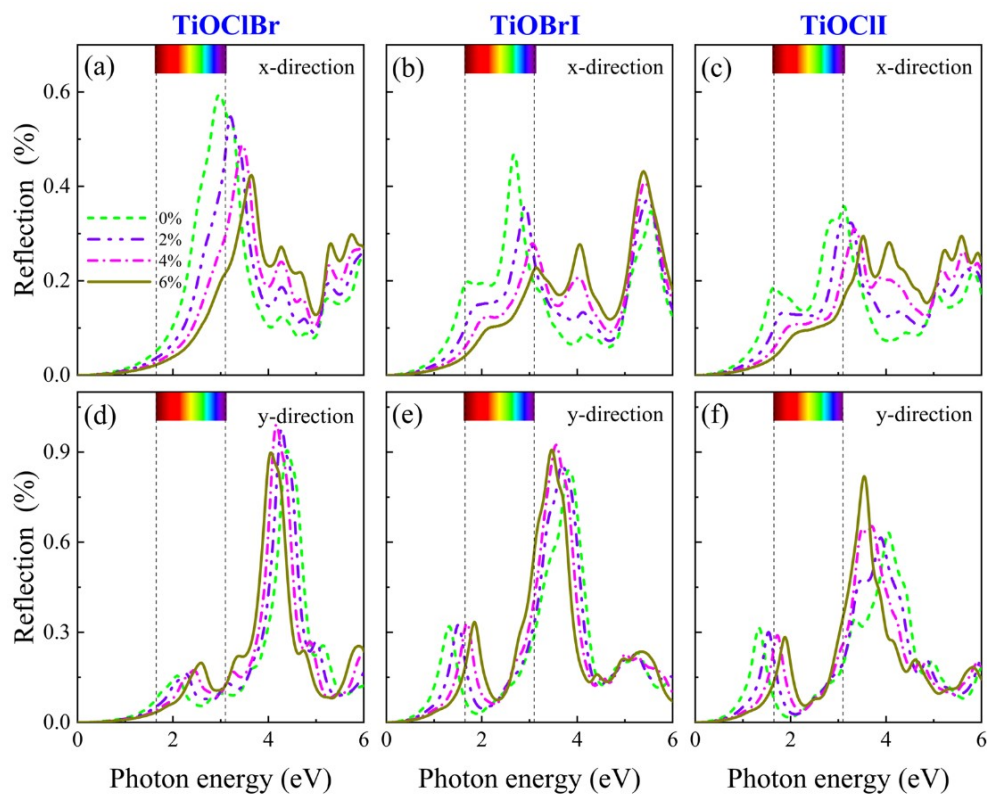

Fig. S4 The photon energy dependent optical reflection coefficients along x directions (a)-(c) and y directions (d)-(f) of the Janus TiOCIBr, TiOBrI, and TiOCII monolayers under different in-plane biaxial strains, respectively. The optical reflection coefficients under the biaxial tensile strains of 0%, 2%, 4%, and 6%, are indicated by the green dashed, purple double-dotted dashed, magenta dashed-dot, and brown solid curves, respectively.

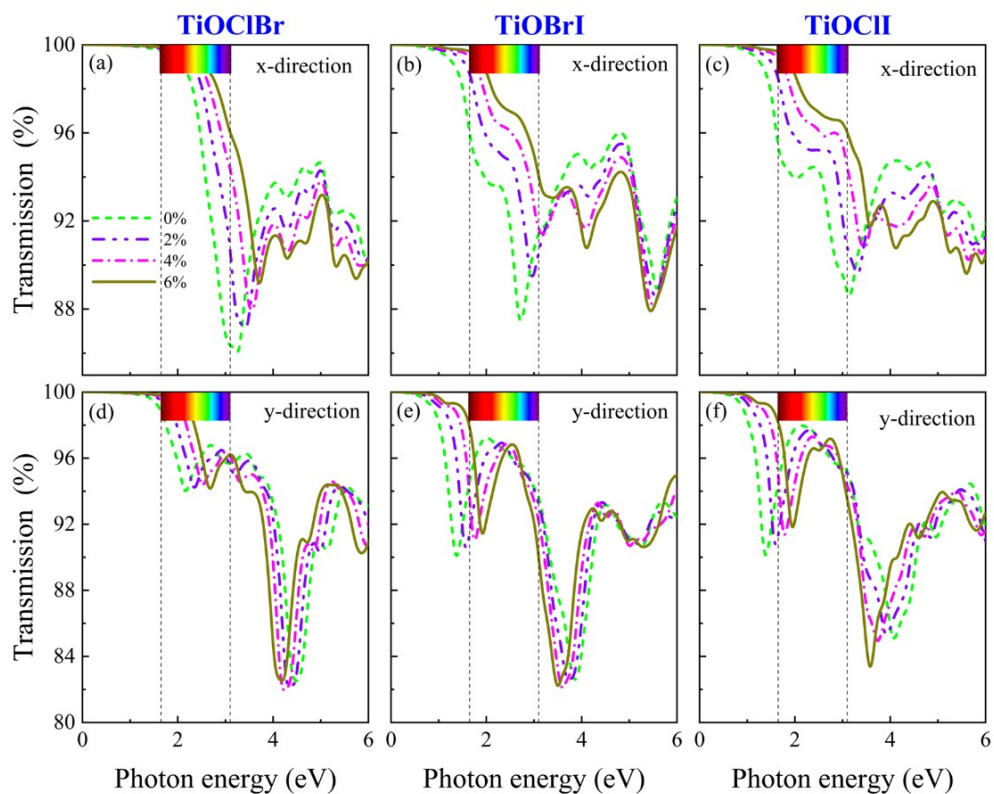

Fig. S5 The photon energy dependent optical transmission coefficients along x directions (a)-(c) and y directions (d)-(f) of the Janus TiOCIBr, TiOBrI, and TiOCII monolayers under different in-plane biaxial strains, respectively. The optical transmission coefficients under the biaxial tensile strains of 0%, 2%, 4%, and 6%, are indicated by the green dashed, purple double-dotted dashed, magenta dashed-dot, and brown solid curves, respectively.
